# Supplementary material
Source: MDPI journal article supplement (https://www.mdpi.com/search?q=materials-12-02832)
Supplement: s001 [file materials-12-02832-s001.pdf]

Supplementary material

# Diferrocenyl Thioketone: Reactions with (Bisphosphane)Pt(0) Complexes—Electrochemical and Computational Studies

Sebastian Gröber <sup>1,2</sup>, Piotr Matczak <sup>3</sup>, Sławomir Domagała <sup>4</sup>, Thomas Weisheit <sup>2</sup>, Helmar Görls <sup>1</sup>, Annika Düver <sup>1</sup>, Grzegorz Mlostoń <sup>5,\*</sup> and Wolfgang Weigand <sup>1,\*</sup>

<sup>1</sup> Institute for Inorganic and Analytical Chemistry, Friedrich-Schiller University Jena, Humboldtstrasse 8, 07743 Jena, Germany

<sup>2</sup> Clinic of Nuclear Medicine, University Hospital Jena, Am Klinikum 1, 07747 Jena, Germany.

<sup>3</sup> Department of Physical Chemistry, Faculty of Chemistry, University of Łódź, Pomorska 163/165, 90236 Lodz, Poland.

<sup>4</sup> Department of Inorganic and Analytical Chemistry, Faculty of Chemistry, University of Łódź, Tamka 12, 91403 Łódź, Poland.

<sup>5</sup> Department of Organic and Applied Chemistry, Faculty of Chemistry, University of Łódź, Tamka 12, 91403 Łódź, Poland

\* Correspondence: grzegorz.mloston@chemia.uni.lodz.pl (G.M.); wolfgang.weigand@uni-jena.de (W.W.); Tel.: +49-3641-948160 (W.W.); Tel.: +48-42-6355761 (G.M.)

## S1. Further Computational Details

The geometry of complex **3c** in its ground electronic state was optimized in the gas phase with a density functional theory (DFT) method. A combination of Becke's 1988 exchange (B) [1] and Perdew's 1986 correlation (P) [2] was selected. The resulting exchange-correlation functional was further improved by incorporating the respective Grimme's D3 dispersion correction [3] with Becke–Johnson damping [4]. This dispersion-corrected functional is denoted in the present work by the abbreviation BP-D. The def2-TZVP basis set [5] was assigned to the atoms of the complex. This basis set replaced 60 core electrons of Pt by a relativistic effective core potential [6]. The resolution-of-the-identity (RI-J) technique [7–9] was used to calculate Coulomb integrals in a cost-effective way. The “m4” grid size was set for the quadrature of exchange-correlation potential. The XRD geometry of complex **3c** (see Table S1) was the starting point for the optimization. No symmetry constraints were imposed and the optimized geometry fulfilled tight convergence criteria (thresholds < 10<sup>−5</sup> au). The calculation of harmonic vibrational frequencies in the complex was performed analytically at the BP-D/def2-TZVP level. The lack of any imaginary frequencies confirmed that the optimized geometry corresponded to a local minimum on the potential energy surface. It is worth noting that BP-D/def2-TZVP predicted a singlet spin multiplicity for the ground electronic state of both the initial XRD and optimized geometries of the complex. For **3c** in its BP-D/def2-TZVP-optimized geometry, a single-point energy calculation was carried out at the BP-D/def2-TZVPP [1–5] level and without the RI-J technique in order to improve the accuracy of the molecular wave function. The augmentation of a basis set from def2-TZVP to def2-TZVPP increased the number of primitive Gaussians from 3429 to 4284. The molecular wave function generated by the BP-D/def2-TZVPP single-point energy calculation was further analyzed by the NBO [10] and QTAIM [11] methods. The “1st-order Promega” algorithm was used as a basic integration method in the QTAIM calculations.

Optimization and vibrational frequency calculations were also performed for the separate thioketone and (dppf)Pt fragments constituting complex **3c** and for a molecule of *tert*-butylthiol (this molecule was included for purposes of comparison). The starting structures of the two fragments for the optimizations were cut out from the XRD structure of complex **3c**. The computational

methodology applied to studying the two fragments and the *tert*-butylthiol molecule was the same as that used for complex **3c**.

**Table S1.** Selected bond lengths (in Å) and angles (in °) measured for complexes **3a–c** using XRD methods.

|                                    | <b>3a</b>   | <b>3b</b>   | <b>3c</b>   |
|------------------------------------|-------------|-------------|-------------|
| P(1)–Pt                            | 2.2384(8)   | 2.2301(7)   | 2.2550(10)  |
| P(2)–Pt                            | 2.2719(8)   | 2.2507(7)   | 2.2877(9)   |
| S(1)–Pt                            | 2.3014(8)   | 2.2990(7)   | 2.2937(9)   |
| C(1)–Pt                            | 2.155(3)    | 2.154(3)    | 2.157(3)    |
| C(1)–S(1)                          | 1.791(3)    | 1.789(3)    | 1.784(4)    |
| C(1)–C(2)                          | 1.493(4)    | 1.485(4)    | 1.494(5)    |
| C(1)–C(12)                         | 1.494(4)    | 1.496(4)    | 1.494(5)    |
| Fe(1)–Fe(2) (intra/intermolecular) | 5.668/5.375 | 5.226/9.608 | 5.241/5.680 |
| P(1)–Pt–P(2)                       | 86.79(3)    | 88.17(3)    | 103.28(3)   |
| P(2)–Pt–S(1)                       | 112.08(3)   | 115.11(3)   | 104.31(3)   |
| P(1)–Pt–C(1)                       | 161.13(3)   | 110.05(8)   | 105.17(10)  |
| C(1)–Pt–S(1)                       | 47.25(8)    | 47.24(8)    | 47.15(10)   |
| Pt–S(1)–C(1)                       | 62.07(10)   | 62.12(9)    | 62.39(11)   |
| S(1)–C(1)–Pt                       | 70.68(11)   | 70.64(10)   | 70.47(12)   |
| C(2)–C(1)–C(12)                    | 111.5(3)    | 118.5(3)    | 116.6(3)    |
| Sum of angles around Pt center     | 360,00      | 360,57      | 359,91      |

**Table S2.** Calculated NBO and QTAIM indicators of bond order for the bonds around the Pt center in complex **3c**. For some of the bonds, their order indices calculated for the isolated **1a** and (dppf)Pt are presented in parentheses. These results were obtained from the B3LYP/def2-TZVPP wave functions of BP-D/def2-TZVP-optimized structures.

| <b>Bond</b> | <b>WBI</b>    | <b>DI</b>     |
|-------------|---------------|---------------|
| Pt–P(1)     | 0.640 (0.723) | 1.040 (1.164) |
| Pt–P(2)     | 0.619 (0.723) | 0.982 (1.165) |
| Pt–S(1)     | 0.682         | 0.912         |
| Pt–C(1)     | 0.433         | 0.713         |
| C(1)–S(1)   | 1.155 (1.688) | 1.164 (1.718) |

**Table S3.** Calculated QTAIM parameters of bond critical points for the bonds around the Pt center in complex **3c**. For some of the bonds, their QTAIM parameters calculated for the isolated **1a** and (dppf)Pt are presented in parentheses. These results were obtained from the B3LYP/def2-TZVPP wave functions of BP-D/def2-TZVP-optimized structures.

| <b>Bond</b> | $\rho$ (au)        | $\nabla^2\rho$ (au)  | $H$ (au)             | $-V/G$             | $-\lambda_1/\lambda_3$ |
|-------------|--------------------|----------------------|----------------------|--------------------|------------------------|
| Pt–P(1)     | 0.1241<br>(0.1284) | 0.0912<br>(0.0748)   | –0.0644<br>(–0.0710) | 1.7395<br>(1.7923) | 0.3514<br>(0.3814)     |
| Pt–P(2)     | 0.1157<br>(0.1285) | 0.1074<br>(0.0748)   | –0.0558<br>(–0.0711) | 1.6759<br>(1.7924) | 0.3242<br>(0.3814)     |
| Pt–S(1)     | 0.1008             | 0.1461               | –0.0400              | 1.5229             | 0.2915                 |
| Pt–C(1)     | 0.1111             | 0.1195               | –0.0464              | 1.6089             | 0.3688                 |
| C(1)–S(1)   | 0.1863<br>(0.2281) | –0.2861<br>(–0.3207) | –0.1392<br>(–0.2708) | 3.0575<br>(2.4206) | 1.2671<br>(1.4192)     |

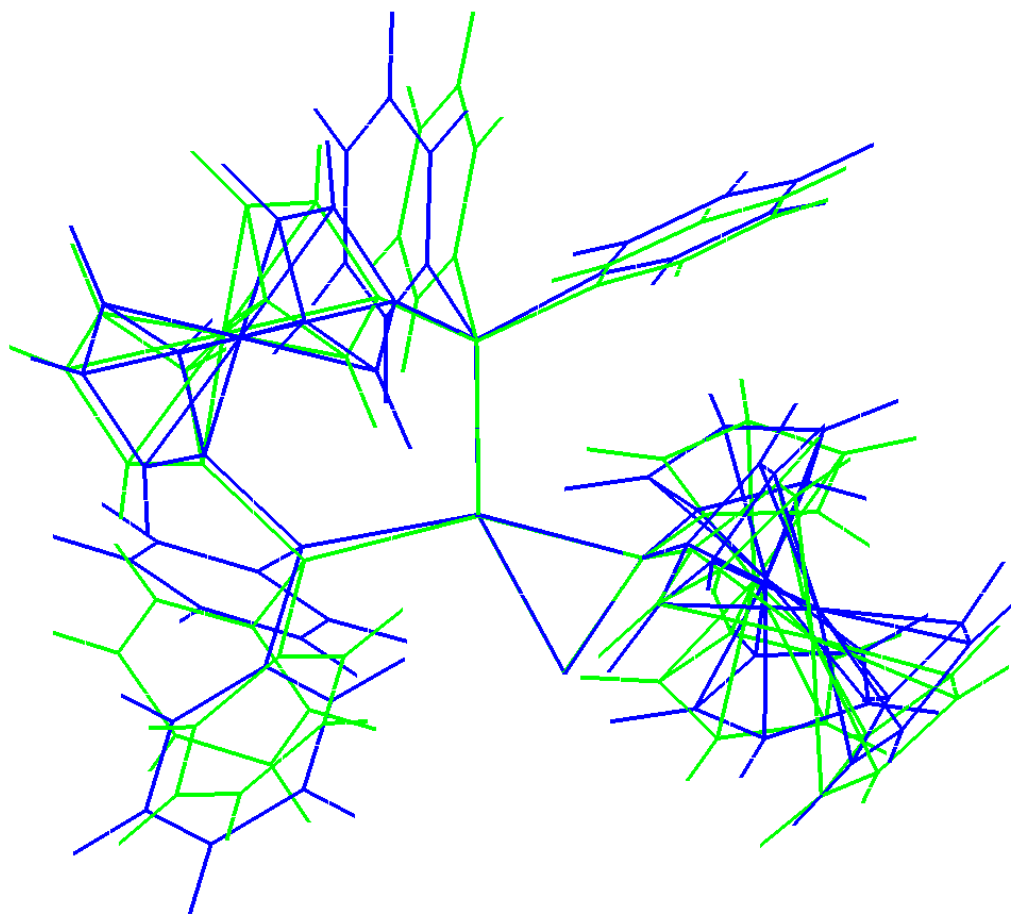

**Figure S1.** Superposition of the calculated (blue) and experimental (green) structures of complex **3c**.

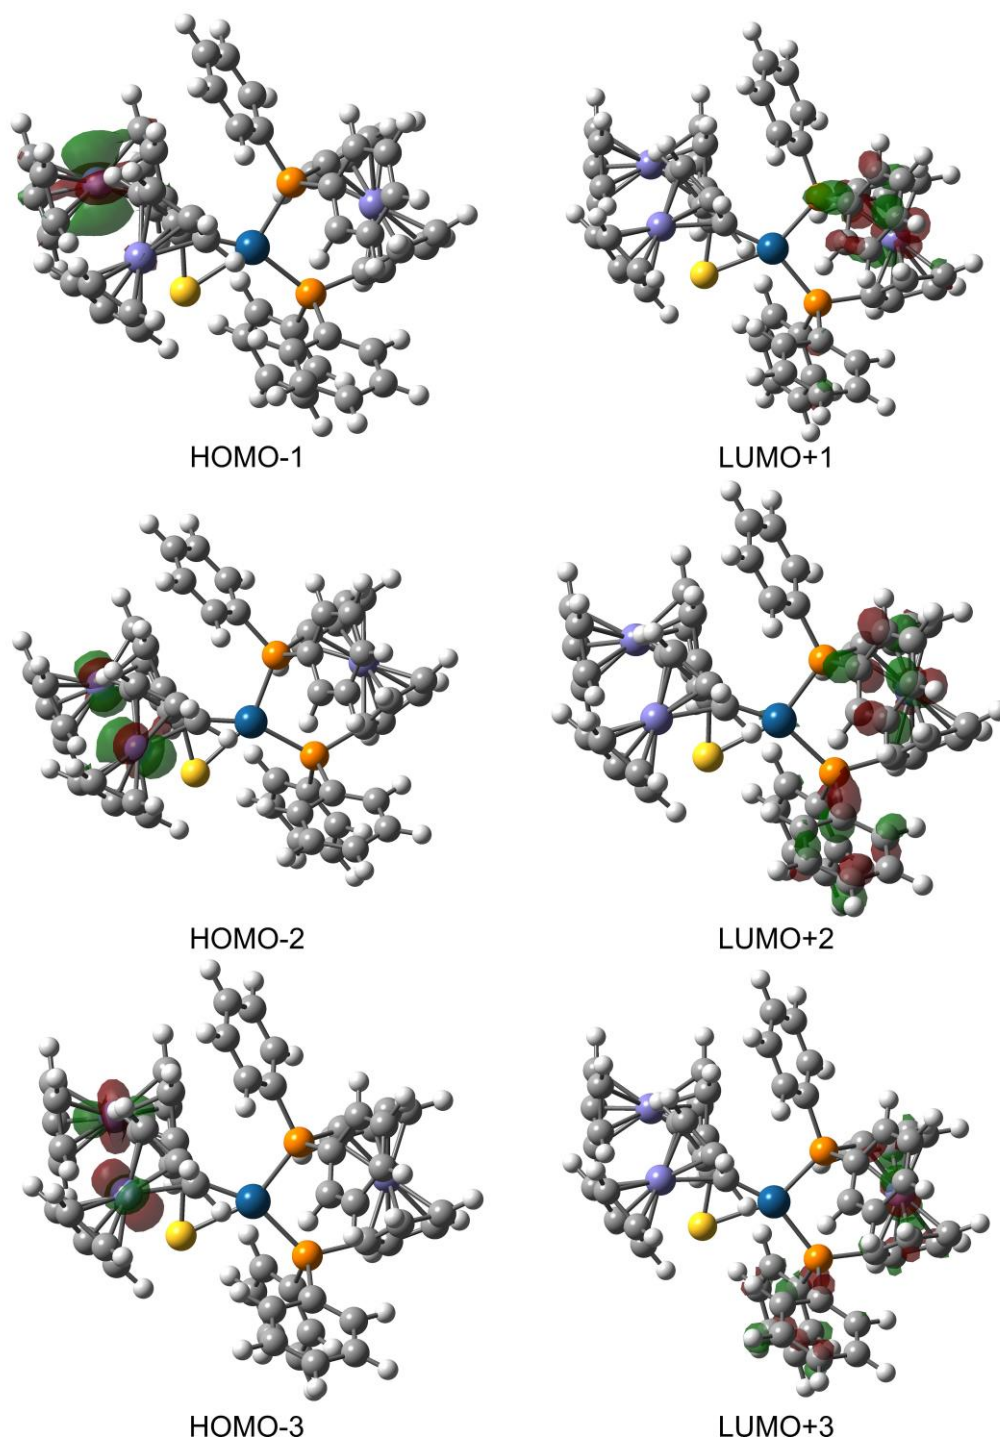

**Figure S2.** Contours of several molecular orbitals below and above the frontier molecular orbitals for complex **3c**. Their parts possessing either positive or negative sign are colored red and green, respectively. The contours are plotted with an isovalue of 0.05 au. The orbitals were obtained from the BP-D/def2-TZVPP wave function of the complex.

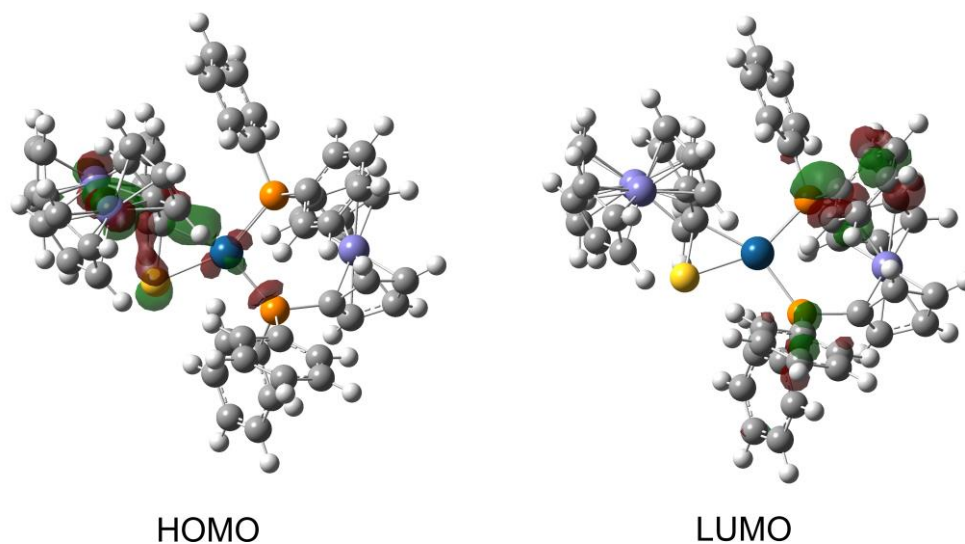

**Figure S3.** Contours of the highest occupied molecular orbital and lowest unoccupied molecular orbital for complex 3c. Their parts possessing either positive or negative sign are colored red and green, respectively. The contours are plotted with an isovalue of 0.05 au. The orbitals were obtained from the B3LYP/def2-TZVPP wave function of the BP-D/def2-TZVP-optimized complex.

## S2. Further Electrochemical Details

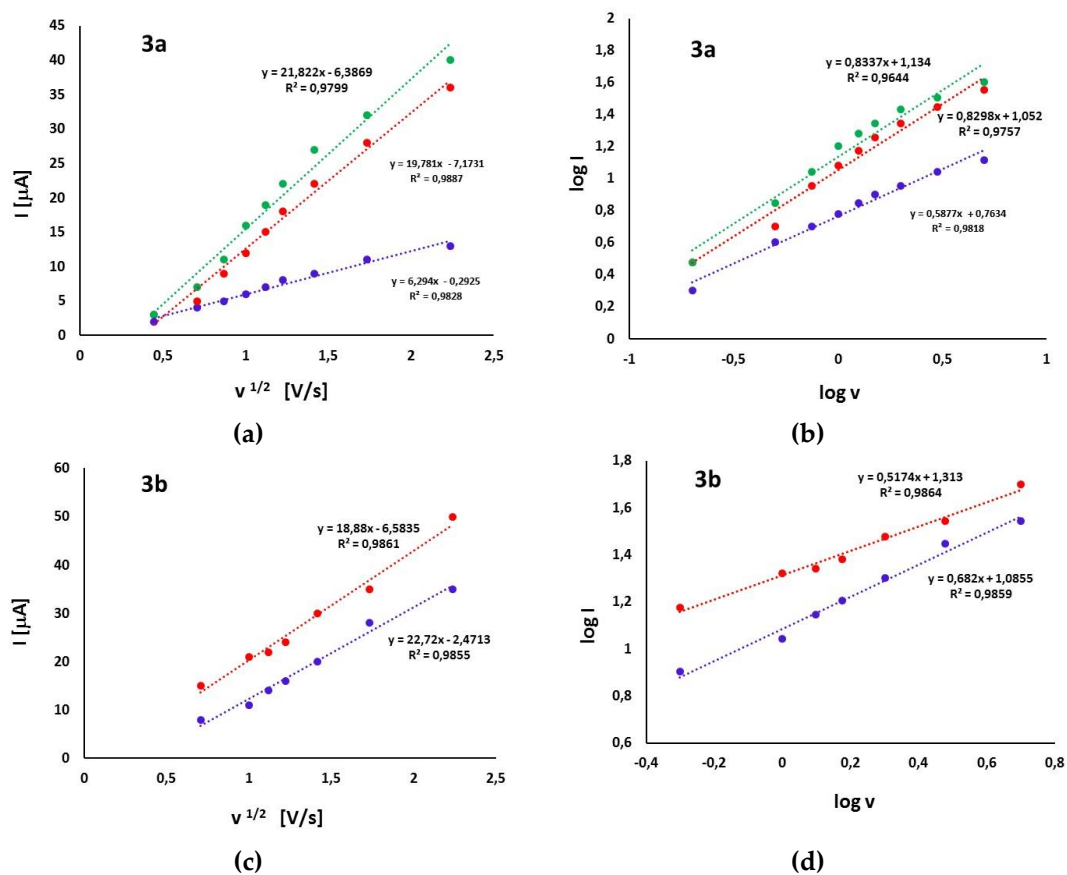

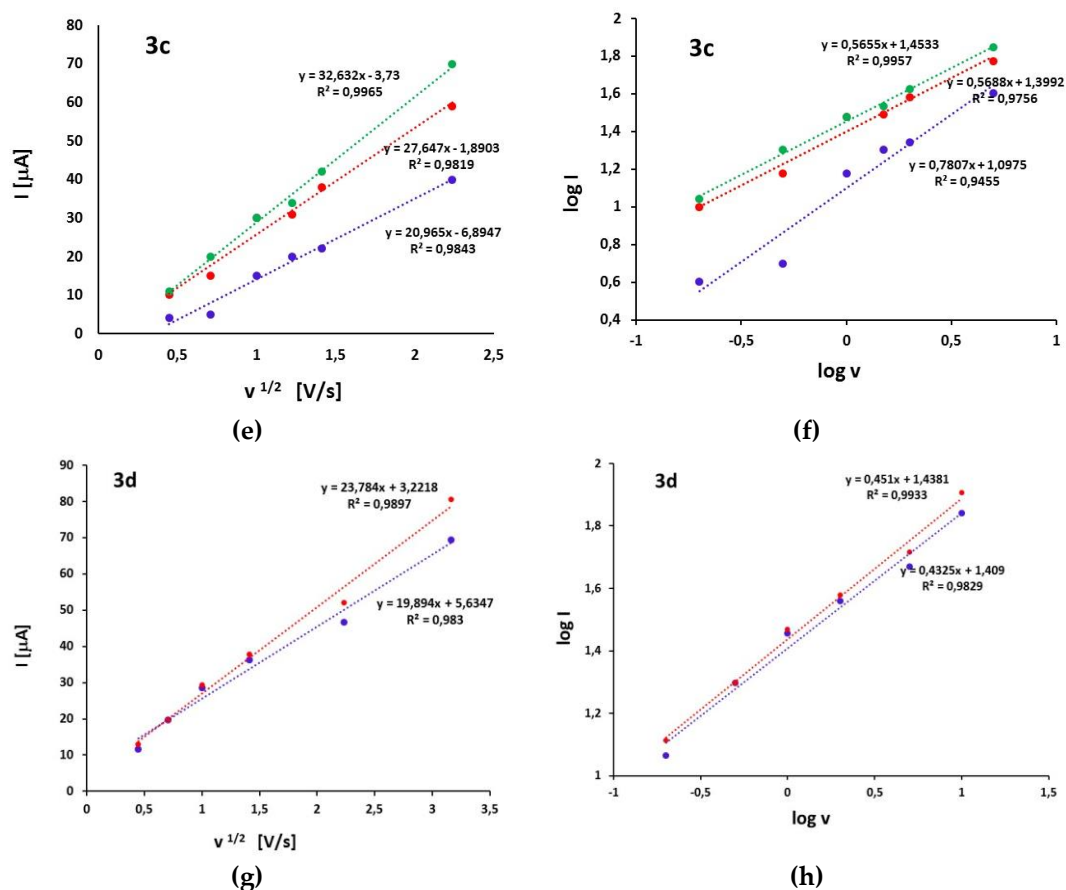

**Figure S4.** Dependence of the peak currents ( $I$ ) from the square root of scan rate ( $v^{1/2}$ ) and logarithm of peak currents ( $\log I$ ) versus logarithm of scan rates ( $\log v$ ) for complexes 3a–d (1.0 mmol/L) in  $\text{CH}_2\text{Cl}_2$ — $[\text{nBu}_4\text{N}][\text{BF}_4]$  (0.1 m/L).

### S3. Further Crystallographic Data

**Table S4.** Crystal data and refinement details for the X-ray structure determinations.

| Compound                                   | 3a                                                          | 3b                                                                     | 3c                                                              |
|--------------------------------------------|-------------------------------------------------------------|------------------------------------------------------------------------|-----------------------------------------------------------------|
| formula                                    | $\text{C}_{58}\text{H}_{50}\text{Fe}_2\text{P}_2\text{PtS}$ | $\text{C}_{56}\text{H}_{46}\text{Cl}_2\text{Fe}_2\text{P}_2\text{PtS}$ | $\text{C}_{55}\text{H}_{46}\text{Fe}_3\text{P}_2\text{PtS}$ [*] |
| fw ( $\text{g}\cdot\text{mol}^{-1}$ )      | 1147.77                                                     | 1190.62                                                                | 1163.56 [*]                                                     |
| $T/^\circ\text{C}$                         | -140 (2)                                                    | -140 (2)                                                               | -140 (2)                                                        |
| crystal system                             | monoclinic                                                  | monoclinic                                                             | triclinic                                                       |
| space group                                | $\text{P } 2_1/c$                                           | $\text{P } 2_1/n$                                                      | $\text{P}\bar{1}$                                               |
| $a/\text{\AA}$                             | 9.2351 (2)                                                  | 22.1669 (3)                                                            | 11.0264 (5)                                                     |
| $b/\text{\AA}$                             | 33.6468 (7)                                                 | 9.6079 (1)                                                             | 12.7663 (6)                                                     |
| $c/\text{\AA}$                             | 15.3738 (3)                                                 | 23.6359 (3)                                                            | 17.8090 (7)                                                     |
| $\alpha/^\circ$                            | 90                                                          | 90                                                                     | 83.222 (2)                                                      |
| $\beta/^\circ$                             | 101.479 (1)                                                 | 110.337 (1)                                                            | 79.406 (2)                                                      |
| $\gamma/^\circ$                            | 90                                                          | 90                                                                     | 76.464 (2)                                                      |
| $V/\text{\AA}^3$                           | 4681.57 (17)                                                | 4720.12 (10)                                                           | 2388.34 (18)                                                    |
| $Z$                                        | 4                                                           | 4                                                                      | 2                                                               |
| $\rho$ ( $\text{g}\cdot\text{cm}^{-3}$ )   | 1.628                                                       | 1.667                                                                  | 1.618 [*]                                                       |
| $\mu$ ( $\text{cm}^{-1}$ )                 | 37.45                                                       | 38.27                                                                  | 39.6 [*]                                                        |
| measured data                              | 33532                                                       | 33475                                                                  | 11623                                                           |
| data with $I > 2\sigma(I)$                 | 9626                                                        | 9802                                                                   | 9835                                                            |
| unique data ( $R_{\text{int}}$ )           | 10592/0.0408                                                | 10719/0.0362                                                           | 10453/0.0296                                                    |
| $wR_2$ (all data, on $F^2$ ) <sup>a)</sup> | 0.0603                                                      | 0.0564                                                                 | 0.0719                                                          |

|                                      |               |               |               |
|--------------------------------------|---------------|---------------|---------------|
| $R_1 (I > 2\sigma(I))$ <sup>a)</sup> | 0.0300        | 0.0269        | 0.0308        |
| $S$ <sup>b)</sup>                    | 1.111         | 1.074         | 1.043         |
| Res. dens./e·Å <sup>-3</sup>         | 0.734/-0.519  | 0.612/-0.686  | 0.978/-1.911  |
| absorpt method                       | multi-scan    | multi-scan    | multi-scan    |
| absorpt corr $T_{\min/\max}$         | 0.6690/0.7456 | 0.6872/0.7456 | 0.5931/0.7456 |
| CCDC No.                             | 1922306       | 1922307       | 1922308       |

[\*] derived parameters do not contain the contribution of the disordered solvent. <sup>a)</sup> Definition of the  $R$  indices:  $R_1 = (\sum ||F_o| - |F_c||) / \sum |F_o|$ ;  $wR_2 = \{\sum [w(F_o^2 - F_c^2)^2] / \sum [w(F_o^2)^2]\}^{1/2}$  with  $w^{-1} = \sigma^2(F_o^2) + (aP)^2 + bP$ ;  $P = [2F_c^2 + \text{Max}(F_o^2)]/3$ ; <sup>b)</sup>  $s = \{\sum [w(F_o^2 - F_c^2)^2] / (N_o - N_p)\}^{1/2}$ .

#### S4. Cartesian Coordinates (in Å) for 3c, 1a and (dppf)Pt-Fragment

**Table S5.** Cartesian coordinates (in Å) for complex 3c optimized at the BP-D/def2-TZVP level of theory.<sup>1</sup>

| Atom | X (in Å) | Y (in Å)  | Z (in Å)  |
|------|----------|-----------|-----------|
| Pt   | 6.349591 | 7.331747  | 12.635139 |
| Fe   | 5.394941 | 11.959588 | 11.076489 |
| Fe   | 4.572142 | 10.313061 | 15.861404 |
| Fe   | 9.211537 | 4.795696  | 10.886714 |
| S    | 4.228175 | 8.284804  | 12.658337 |
| P    | 8.579137 | 7.428944  | 12.887853 |
| P    | 6.103759 | 5.10597   | 12.196501 |
| C    | 5.639419 | 9.341508  | 12.955411 |
| C    | 6.0997   | 10.178027 | 11.827487 |
| C    | 7.125248 | 11.1913   | 11.84091  |
| H    | 7.663046 | 11.536407 | 12.71554  |
| C    | 7.33142  | 11.652654 | 10.502553 |
| H    | 8.035278 | 12.422828 | 10.199914 |
| C    | 6.432232 | 10.939516 | 9.644807  |
| H    | 6.320845 | 11.080356 | 8.573322  |
| C    | 5.671561 | 10.041229 | 10.457821 |
| H    | 4.879636 | 9.375463  | 10.131817 |
| C    | 3.883087 | 12.524139 | 12.325295 |
| H    | 3.627835 | 11.988271 | 13.232808 |
| C    | 4.858458 | 13.570475 | 12.215827 |
| H    | 5.434133 | 13.997591 | 13.032378 |
| C    | 4.95362  | 13.947054 | 10.835152 |
| H    | 5.617959 | 14.700948 | 10.42293  |
| C    | 4.036738 | 13.132889 | 10.091871 |
| H    | 3.888222 | 13.158794 | 9.016185  |
| C    | 3.376331 | 12.252788 | 11.013335 |
| H    | 2.649135 | 11.487417 | 10.759397 |
| C    | 5.886756 | 9.815498  | 14.342529 |
| C    | 6.040422 | 8.961508  | 15.492952 |
| H    | 5.919423 | 7.882709  | 15.476099 |
| C    | 6.377968 | 9.768469  | 16.626016 |
| H    | 6.547481 | 9.409772  | 17.637284 |
| C    | 6.408171 | 11.136479 | 16.196015 |
| H    | 6.603598 | 12.001257 | 16.824095 |
| C    | 6.096886 | 11.165679 | 14.79782  |
| H    | 6.020612 | 12.049763 | 14.176295 |
| C    | 2.679157 | 10.295549 | 15.080108 |

---

|   |           |           |           |
|---|-----------|-----------|-----------|
| H | 2.452453  | 10.172386 | 14.025482 |
| C | 2.849043  | 9.227106  | 16.017531 |
| H | 2.772842  | 8.169867  | 15.784667 |
| C | 3.19673   | 9.801358  | 17.285041 |
| H | 3.418741  | 9.253023  | 18.196102 |
| C | 3.245759  | 11.225894 | 17.12748  |
| H | 3.505793  | 11.945242 | 17.89869  |
| C | 2.923998  | 11.531283 | 15.764197 |
| H | 2.890112  | 12.524642 | 15.326264 |
| C | 9.474838  | 6.707149  | 11.494914 |
| C | 8.910816  | 6.677108  | 10.167143 |
| H | 7.942809  | 7.093251  | 9.902663  |
| C | 9.818226  | 5.978397  | 9.313078  |
| H | 9.660156  | 5.758434  | 8.261427  |
| C | 10.94554  | 5.572991  | 10.097707 |
| H | 11.791038 | 4.988803  | 9.745403  |
| C | 10.740449 | 6.02051   | 11.441206 |
| H | 11.396181 | 5.832652  | 12.284717 |
| C | 7.482901  | 4.050187  | 11.665509 |
| C | 7.692644  | 3.537769  | 10.335655 |
| H | 7.021876  | 3.687134  | 9.495815  |
| C | 8.939441  | 2.838153  | 10.316545 |
| H | 9.390092  | 2.366402  | 9.448179  |
| C | 9.508324  | 2.906082  | 11.628404 |
| H | 10.466402 | 2.494978  | 11.932945 |
| C | 8.62073   | 3.657097  | 12.461951 |
| H | 8.778368  | 3.90658   | 13.505774 |
| C | 9.207463  | 6.558533  | 14.371076 |
| C | 10.555096 | 6.634089  | 14.753595 |
| H | 11.243991 | 7.264396  | 14.189594 |
| C | 11.00837  | 5.928476  | 15.868448 |
| H | 12.058351 | 5.988507  | 16.15817  |
| C | 10.117504 | 5.154857  | 16.620253 |
| H | 10.474801 | 4.606867  | 17.493099 |
| C | 8.768142  | 5.102078  | 16.26333  |
| H | 8.062315  | 4.516052  | 16.853003 |
| C | 8.315774  | 5.805534  | 15.14572  |
| H | 7.263141  | 5.777954  | 14.861321 |
| C | 9.353244  | 9.070405  | 13.069927 |
| C | 9.204066  | 9.75827   | 14.284615 |
| H | 8.657571  | 9.299527  | 15.108442 |
| C | 9.735921  | 11.037486 | 14.43377  |
| H | 9.604114  | 11.565493 | 15.378568 |
| C | 10.420685 | 11.642668 | 13.374663 |
| H | 10.834619 | 12.644868 | 13.492615 |
| C | 10.566176 | 10.962892 | 12.163418 |
| H | 11.091399 | 11.432801 | 11.330989 |
| C | 10.031917 | 9.682484  | 12.008098 |
| H | 10.137986 | 9.159104  | 11.057962 |
| C | 4.900808  | 4.79061   | 10.853927 |
| C | 4.666105  | 5.803189  | 9.914869  |
| H | 5.153619  | 6.770349  | 10.048699 |

---



|   |          |          |           |
|---|----------|----------|-----------|
| C | 3.79291  | 5.581088 | 8.848285  |
| H | 3.612103 | 6.374961 | 8.122542  |
| C | 3.140473 | 4.352632 | 8.722569  |
| H | 2.450151 | 4.182624 | 7.895273  |
| C | 3.36231  | 3.343785 | 9.665798  |
| H | 2.844413 | 2.387894 | 9.576406  |
| C | 4.242071 | 3.559531 | 10.726446 |
| H | 4.41136  | 2.773523 | 11.463763 |
| C | 5.423705 | 4.202231 | 13.637365 |
| C | 5.767391 | 2.877638 | 13.94275  |
| H | 6.453948 | 2.331491 | 13.295772 |
| C | 5.246133 | 2.261134 | 15.082722 |
| H | 5.523966 | 1.232158 | 15.315521 |
| C | 4.375136 | 2.959324 | 15.922326 |
| H | 3.973303 | 2.477956 | 16.814873 |
| C | 4.023393 | 4.278087 | 15.617578 |
| H | 3.344282 | 4.828503 | 16.269992 |
| C | 4.546894 | 4.900478 | 14.485081 |
| H | 4.2944   | 5.938817 | 14.253057 |

<sup>1</sup> The total energy amounts to -7117.47021285869 hartree.

**Table S6.** Cartesian coordinates (in Å) for thioketone **1a** optimized at the BP-D/def2-TZVP level of theory.<sup>1</sup>

| Atom | X (in Å) | Y (in Å)  | Z (in Å)  |
|------|----------|-----------|-----------|
| Fe   | 5.069636 | 11.854642 | 11.338941 |
| Fe   | 4.855314 | 10.231233 | 16.141428 |
| S    | 5.080581 | 7.933517  | 13.061739 |
| C    | 5.758559 | 9.445478  | 13.227784 |
| C    | 6.097861 | 10.236068 | 12.05056  |
| C    | 6.949324 | 11.409817 | 11.983096 |
| H    | 7.482839 | 11.852581 | 12.816787 |
| C    | 6.995326 | 11.848988 | 10.6258   |
| H    | 7.54185  | 12.712035 | 10.256518 |
| C    | 6.169273 | 10.976436 | 9.844281  |
| H    | 5.972978 | 11.070777 | 8.780335  |
| C    | 5.614366 | 9.991223  | 10.71246  |
| H    | 4.935898 | 9.187387  | 10.448133 |
| C    | 3.53303  | 12.249569 | 12.635874 |
| H    | 3.396423 | 11.71913  | 13.571884 |
| C    | 4.339618 | 13.418549 | 12.449065 |
| H    | 4.874134 | 13.960082 | 13.224124 |
| C    | 4.329487 | 13.74359  | 11.052886 |
| H    | 4.862083 | 14.56581  | 10.584424 |
| C    | 3.515363 | 12.774134 | 10.379607 |
| H    | 3.327938 | 12.731224 | 9.310848  |
| C    | 3.024188 | 11.84855  | 11.359207 |
| H    | 2.40407  | 10.978927 | 11.165126 |
| C    | 6.114539 | 9.977097  | 14.546982 |
| C    | 6.506327 | 9.159088  | 15.673786 |
| H    | 6.570559 | 8.076294  | 15.64424  |
| C    | 6.788187 | 10.018941 | 16.778335 |
| H    | 7.097907 | 9.698973  | 17.768875 |

|   |          |           |           |
|---|----------|-----------|-----------|
| C | 6.543927 | 11.370571 | 16.368484 |
| H | 6.629978 | 12.253213 | 16.995855 |
| C | 6.128645 | 11.350902 | 15.000316 |
| H | 5.838602 | 12.208934 | 14.405508 |
| C | 2.959456 | 9.822396  | 15.490857 |
| H | 2.712214 | 9.618864  | 14.452579 |
| C | 3.392264 | 8.840595  | 16.438973 |
| H | 3.51522  | 7.781491  | 16.236534 |
| C | 3.695143 | 9.518278  | 17.66625  |
| H | 4.074714 | 9.057061  | 18.573228 |
| C | 3.452073 | 10.917969 | 17.472882 |
| H | 3.6106   | 11.701475 | 18.207997 |
| C | 2.993478 | 11.105117 | 16.1283   |
| H | 2.7357   | 12.057724 | 15.674673 |

<sup>1</sup> The total energy amounts to -3737.75343192882 hartree. The starting geometry for the optimization was cut out from the XRD structure of **3c**.

**Table S7.** Cartesian coordinates (in Å) for (dppf)Pt-fragment optimized at the BP-D/def2-TZVP level of theory.<sup>1</sup>

| Atom | X (in Å)  | Y (in Å) | Z (in Å)  |
|------|-----------|----------|-----------|
| Pt   | 6.732068  | 6.635746 | 13.563883 |
| Fe   | 8.985858  | 4.564078 | 11.385604 |
| P    | 8.795975  | 7.399264 | 13.332294 |
| P    | 5.809973  | 4.822257 | 12.694103 |
| C    | 9.40505   | 6.514069 | 11.861078 |
| C    | 8.66869   | 6.43294  | 10.625091 |
| H    | 7.689908  | 6.867847 | 10.453944 |
| C    | 9.426069  | 5.650388 | 9.699867  |
| H    | 9.120498  | 5.385165 | 8.691957  |
| C    | 10.628854 | 5.230969 | 10.355499 |
| H    | 11.396977 | 4.589981 | 9.931742  |
| C    | 10.618623 | 5.75991  | 11.686615 |
| H    | 11.373497 | 5.600361 | 12.450023 |
| C    | 7.248081  | 3.825989 | 12.185378 |
| C    | 7.527527  | 3.208195 | 10.915658 |
| H    | 6.89009   | 3.260218 | 10.038744 |
| C    | 8.80046   | 2.557524 | 11.005601 |
| H    | 9.303448  | 2.030172 | 10.199793 |
| C    | 9.316862  | 2.768683 | 12.325108 |
| H    | 10.279219 | 2.43015  | 12.697687 |
| C    | 8.368274  | 3.553918 | 13.050094 |
| H    | 8.47445   | 3.920583 | 14.0653   |
| C    | 10.009822 | 6.894645 | 14.612126 |
| C    | 11.332345 | 7.360403 | 14.616133 |
| H    | 11.654064 | 8.084194 | 13.86573  |
| C    | 12.232471 | 6.908582 | 15.582825 |
| H    | 13.259598 | 7.276513 | 15.581542 |
| C    | 11.818482 | 5.991272 | 16.553487 |
| H    | 12.523017 | 5.641887 | 17.309476 |
| C    | 10.497551 | 5.534906 | 16.562743 |
| H    | 10.166333 | 4.831116 | 17.327632 |
| C    | 9.596123  | 5.989128 | 15.598883 |

|   |           |           |           |
|---|-----------|-----------|-----------|
| H | 8.552216  | 5.664193  | 15.597761 |
| C | 9.311317  | 9.124544  | 12.979732 |
| C | 8.860532  | 10.124564 | 13.855317 |
| H | 8.213392  | 9.84802   | 14.690804 |
| C | 9.225556  | 11.454681 | 13.655713 |
| H | 8.874444  | 12.223815 | 14.345084 |
| C | 10.028587 | 11.8044   | 12.564521 |
| H | 10.305109 | 12.84681  | 12.40136  |
| C | 10.466203 | 10.816967 | 11.679527 |
| H | 11.087095 | 11.086136 | 10.823611 |
| C | 10.113196 | 9.480597  | 11.886594 |
| H | 10.458664 | 8.710716  | 11.195925 |
| C | 4.910887  | 5.032216  | 11.108568 |
| C | 4.937975  | 6.29054   | 10.491651 |
| H | 5.445913  | 7.109312  | 11.008403 |
| C | 4.314247  | 6.485723  | 9.258446  |
| H | 4.339533  | 7.468855  | 8.786341  |
| C | 3.648897  | 5.425441  | 8.636914  |
| H | 3.155888  | 5.577463  | 7.675778  |
| C | 3.602591  | 4.172596  | 9.255981  |
| H | 3.072435  | 3.346779  | 8.779186  |
| C | 4.229546  | 3.975697  | 10.487637 |
| H | 4.183877  | 3.000234  | 10.974319 |
| C | 4.77251   | 3.580043  | 13.558399 |
| C | 5.070659  | 2.210612  | 13.582692 |
| H | 5.960056  | 1.841712  | 13.070804 |
| C | 4.23439   | 1.321136  | 14.263018 |
| H | 4.476103  | 0.257274  | 14.280738 |
| C | 3.092912  | 1.790269  | 14.916329 |
| H | 2.441491  | 1.094678  | 15.446912 |
| C | 2.792351  | 3.156699  | 14.897636 |
| H | 1.906251  | 3.528851  | 15.413778 |
| C | 3.633074  | 4.046868  | 14.23192  |
| H | 3.418219  | 5.117884  | 14.234495 |

<sup>1</sup> The total energy amounts to -3379.61267916211 hartree. The starting geometry for the optimization was cut out from the XRD structure of **3c**.

## References

1. Becke, A.D. Density-functional exchange-energy approximation with correct asymptotic behavior. *Phys. Rev. A* **1988**, *38*, 3098–3100.
2. Perdew, J.P. Density-functional approximation for the correlation energy of the inhomogeneous electron gas. *Phys. Rev. B* **1986**, *33*, 8822–8824.
3. Grimme, S.; Antony, J.; Ehrlich, S.; Krieg, H. A consistent and accurate ab initio parametrization of density functional dispersion correction (DFT-D) for the 94 elements H-Pu. *J. Chem. Phys.* **2010**, *132*, 154104.
4. Grimme, S.; Ehrlich, S.; Goerigk, L. Effect of the damping function in dispersion corrected density functional theory. *J. Comput. Chem.* **2011**, *32*, 1456–1465.
5. Weigend, F.; Ahlrichs, R. Balanced basis sets of split valence, triple zeta valence and quadruple zeta valence quality for H to Rn: design and assessment of accuracy. *Phys. Chem. Chem. Phys.* **2005**, *7*, 3297–3305.
6. Andrae, D.; Häußermann, U.; Dolg, M.; Stoll, H.; Preuß, H. Energy-adjusted ab initio pseudopotentials for the second and third row transition elements. *Theor. Chem. Acc.* **1990**, *77*, 123–141.
7. Eichkorn, K.; Treutler, O.; Öhm, H.; Häser, M.; Ahlrichs, R. Auxiliary basis sets to approximate Coulomb potentials. *Chem. Phys. Lett.* **1995**, *240*, 283–290.

8. Eichkorn, K.; Weigend, F.; Treutler, O.; Ahlrichs, R. Auxiliary basis sets for main row atoms and transition metals and their use to approximate Coulomb potentials. *Theor. Chem. Acc.* **1997**, *97*, 119–124.
9. Weigend, F. Accurate Coulomb-fitting basis sets for H to Rn. *Phys. Chem. Chem. Phys.* **2006**, *8*, 1057–1065.
10. Reed, A.E.; Curtiss, L.A.; Weinhold, F. Intermolecular interactions from a natural bond orbital, donor-acceptor viewpoint. *Chem. Rev.* **1988**, *88*, 899–926.
11. Bader, R.F.W. *Atoms in Molecules: A Quantum Theory*. Clarendon: Oxford, UK, 1990.

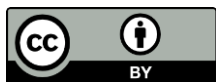

© 2019 by the authors. Submitted for possible open access publication under the terms and conditions of the Creative Commons Attribution (CC BY) license (<http://creativecommons.org/licenses/by/4.0/>).
